# Supplementary material for: Microbiome–Metabolomic Analysis Revealed the Immunoprotective Effects of the Extract of Vanilla planifolia Andrew (EVPA) on Immunosuppressed Mice
Source: MDPI journal article supplement (doi:10.3390/foods13050701), 2024-02-26
Supplement: s1 [file s1]

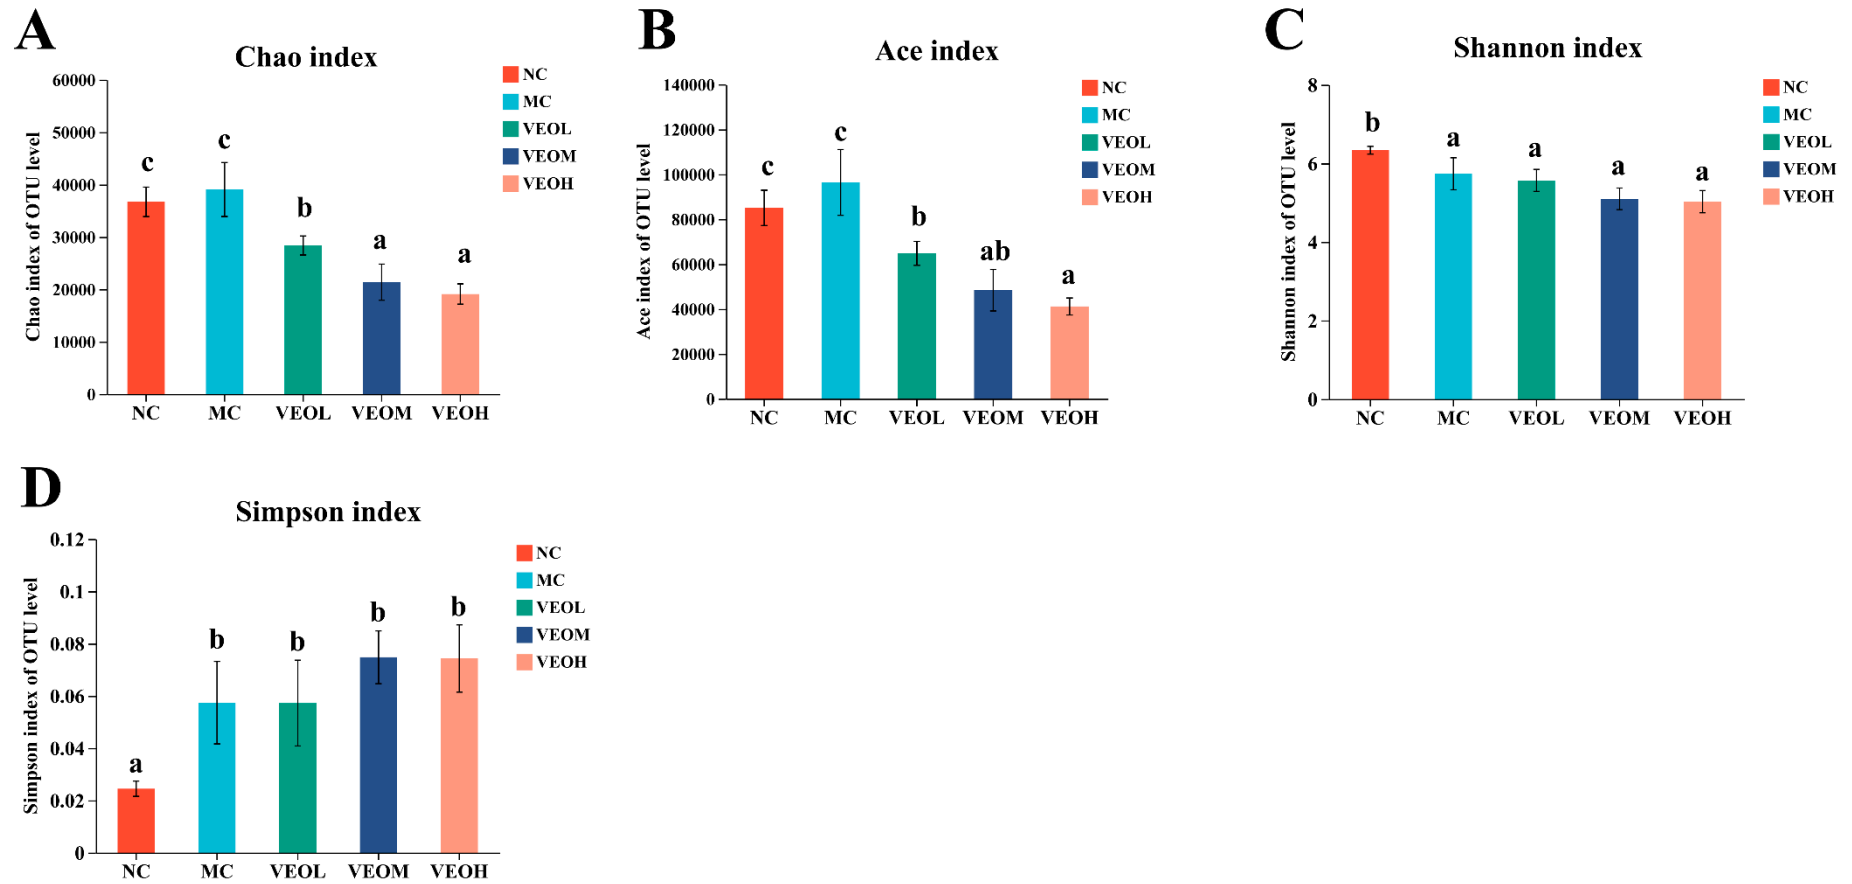

**Figure S1.** Effects of VOE on the  $\alpha$  diversity of gut microbiota in immunosuppressed mice. (A) Chao 1, (B) ACE, (C) Shannon and (D) Simpson indexes. Values with different letters of the same indicator are significantly different ( $p < 0.05$ ).

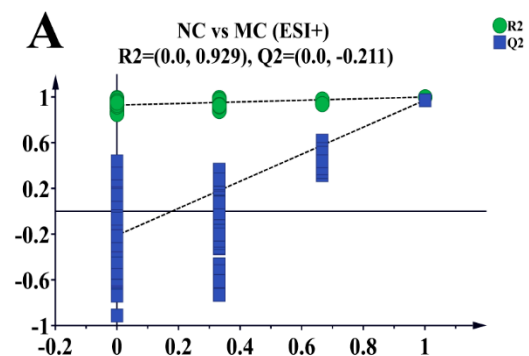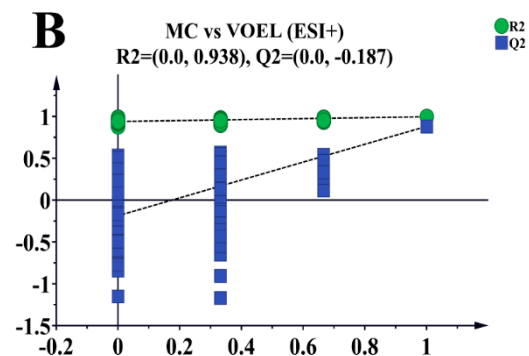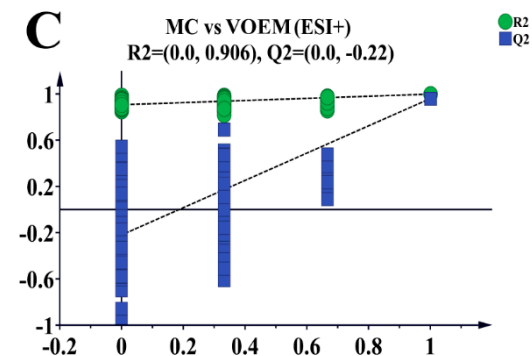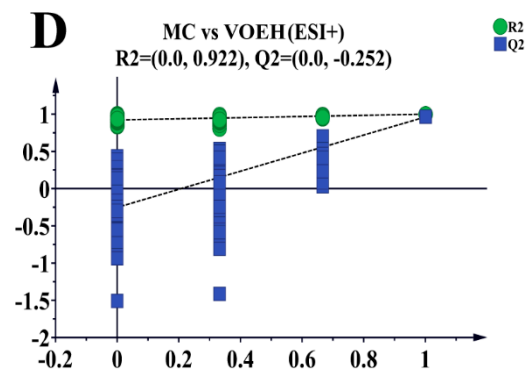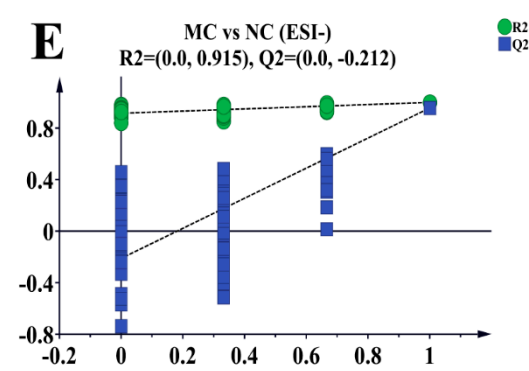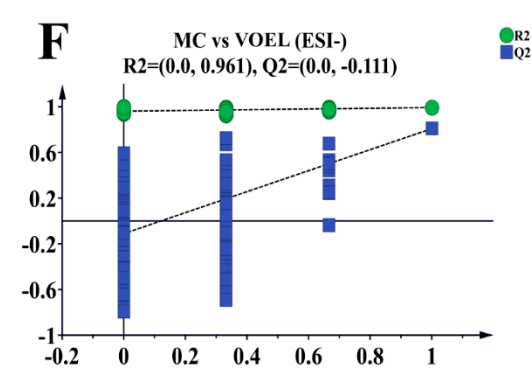

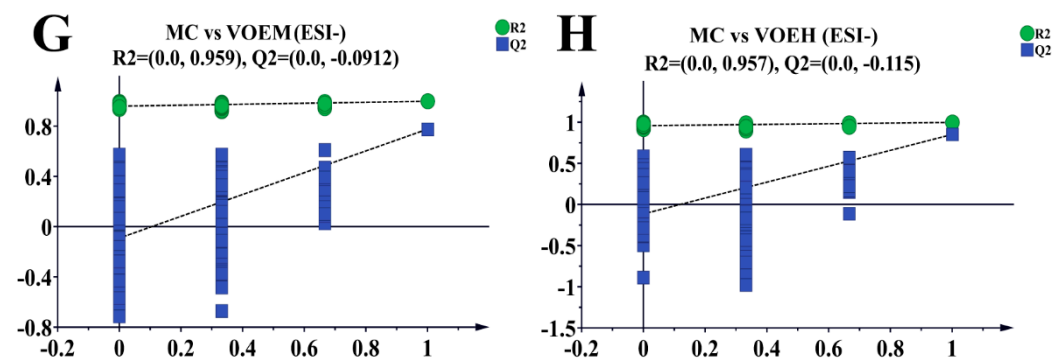

**Figure S2.** The permutation of OPLS-DA (A), (C), (E), (G) in positive ion mode and (B), (D), (F), (H) in negative ion mode in feces samples of mice

**Table S1 Fecal differential metabolites in NC, MC, and VOEH groups**

| No. | Compound                                    | MC vs NC            |        | MC vs VOEH          |        | HMDB ID/<br>KEGG ID | RT    | Mass    |
|-----|---------------------------------------------|---------------------|--------|---------------------|--------|---------------------|-------|---------|
|     |                                             | log <sub>2</sub> FC | Change | log <sub>2</sub> FC | Change |                     |       |         |
| 1   | 7-Sulfocholic acid                          | 2.27                | up     | 2.27                | up     | HMDB0002421         | 9.70  | 488.24  |
| 2   | 3-Pyridylacetic acid                        | 1.92                | up     | 1.92                | up     | HMDB0001538         | 1.63  | 137.05  |
| 3   | Cyclopassifloic acid B                      | 2.31                | up     | 1.49                | up     | HMDB0038388         | 21.12 | 580.40  |
| 4   | Urobilinogen                                | -9.23               | down   | -8.85               | down   | C05791              | 10.74 | 590.31  |
| 5   | Formamidopyrimidine nucleoside triphosphate | 1.62                | up     | 1.62                | up     | C05922              | 10.39 | 562.98  |
| 6   | Ganglioside GD1a (d18:1/22:0)               | 1.94                | up     | 1.94                | up     | HMDB0011799         | 10.59 | 1892.05 |
| 7   | Cer (d18:1/18:0)                            | 2.25                | up     | 1.48                | up     | HMDB0000829         | 21.89 | 1092.73 |
| 8   | L-655,240                                   | 2.85                | up     | 3.52                | up     | HMDB0341170         | 25.10 | 373.13  |
| 9   | N-arachidonoyl tyrosine                     | 2.40                | up     | 1.64                | up     | HMDB0062331         | 17.30 | 513.31  |
| 10  | N-docosahexaenoyl phenylalanine             | 2.17                | up     | 1.36                | up     | HMDB0062333         | 24.85 | 475.31  |
| 11  | N-oleoyl tyrosine                           | 2.46                | up     | 1.07                | up     | HMDB0062337         | 24.27 | 445.32  |
| 12  | PA (22:6/20:5)                              | 1.93                | up     | 1.15                | up     | HMDB0115418         | 9.38  | 766.46  |
| 13  | PA (20:0/22:4)                              | 1.95                | up     | 1.22                | up     | HMDB0115085         | 22.32 | 824.59  |
| 14  | Pantetheine                                 | 2.22                | up     | 1.57                | up     | C00831              | 6.67  | 300.11  |
| 15  | PC (15:0/0:0)                               | 1.63                | up     | 1.19                | up     | HMDB0010381         | 18.39 | 481.32  |
| 16  | Rhizocticin A                               | 1.96                | up     | 1.16                | up     | C17944              | 4.89  | 397.13  |
| 17  | Siroheme                                    | 1.96                | up     | 1.96                | up     | C00748              | 10.82 | 914.22  |
| 18  | Trichostatin A                              | 2.22                | up     | 1.44                | up     | HMDB0259177         | 9.41  | 302.16  |
